# Supplementary material for: Heterosis Is Prevalent for Multiple Traits in Diverse Maize Germplasm
Source: PLoS One. 2009 Oct 13;4(10):e7433. doi: 10.1371/journal.pone.0007433 (PMC2757727; doi:10.1371/journal.pone.0007433)
Supplement: Table S2 — Phenotypic data for population 2. (0.10 MB XLS) [file pone.0007433.s002.xls]

## Sheet: Sup table 2
Genotype	Avg_Inbred_seed wieght	Avg_B73outcross_seed wieght	Avg_Mo17outcross_seed wieght	B73_seed wt	Mo17_seed wt	Avg_Inbred_cob g	Avg_B73outcross_cob g	Avg_Mo17outcross_cob g	B73_cob g	Mo17_cob g	Avg_Inbred_cob dia	Avg_B73outcross_cob dia	Avg_Mo17outcross_cob dia	B73_cob dia	Mo17_cob dia	Avg_Inbred_cob len	Avg_B73outcross_cob len	Avg_Mo17outcross_cob len	B73_cob len	Mo17_cob len	Avg_Inbred_ind seed(g)	Avg_B73outcross_ind seed(g)	Avg_Mo17outcross_ind seed(g)	B73_ind seed(g)	Mo17_ind seed(g)	Avg_Inbred_seed#	Avg_B73outcross_seed#	Avg_Mo17outcross_seed#	B73_seed#	Mo17_seed#	Avg_Inbred_hgt	Avg_B73outcross_hgt	Avg_Mo17outcross_hgt	B73_hgt	Mo17_hgt
33-16	41.85		220.383	96.52	72.0167	15.45		32.7167	20.3	9.2	2.325		2.48333	2.4	1.6	13.175		20.7333	12.9	14.4	0.317242		0.340469	0.25052	0.308667	133.261		652.267	385.9	234.5	231.667	280.167	297.667	218.167	223.667
A188	63.48	156.35	159.617	96.52	72.0167	10.28	20.9333	17.8	20.3	9.2	2.21	2.30833	2.03333	2.4	1.6	11.84	15.1833	19.2167	12.9	14.4	0.290772	0.299195	0.331653	0.25052	0.308667	217.927	524.662	479.157	385.9	234.5	176.333	275.333	269.833	218.167	223.667
A239	93.6667	172.383	148.62	96.52	72.0167	17.3833	26.2333	23.42	20.3	9.2	2.175	2.4	2.15	2.4	1.6	14.5	15.1833	15.92	12.9	14.4	0.314967	0.287162	0.32172	0.25052	0.308667	296.515	603.931	461.681	385.9	234.5	205.833	293.167	255	218.167	223.667
A619	79.5833	189.467	124.667	96.52	72.0167	20.0667	27.35	21.8167	20.3	9.2	3.01667	2.68333	2.23333	2.4	1.6	16.1167	16	14.7333	12.9	14.4	0.256967	0.312167	0.311962	0.25052	0.308667	309.938	604.814	400.144	385.9	234.5	209.5	286.5	313.5	218.167	223.667
A632	80.06	132.933	194.917	96.52	72.0167	15.98	19.75	21.55	20.3	9.2	2.4	2.14167	2.09167	2.4	1.6	14.46	14.4167	18.6333	12.9	14.4	0.2492	0.24511	0.310377	0.25052	0.308667	320.808	539.384	625.853	385.9	234.5	207.833	275.5	296.167	218.167	223.667
A634	54.7167	161.667	206.65	96.52	72.0167	15.5833	28.4	30.1167	20.3	9.2	2.475	2.66667	2.375	2.4	1.6	11.3667	16.0833	19.5333	12.9	14.4	0.296944	0.3258	0.362233	0.25052	0.308667	192.529	498.407	566.951	385.9	234.5	198.5	257.5	281	218.167	223.667
A635	28.7667	148.617	141.917	96.52	72.0167	5.1	24.7667	18.2667	20.3	9.2	1.56667	2.35	1.90833	2.4	1.6	9.7	15.6667	15.5167	12.9	14.4	0.165733	0.260967	0.275187	0.25052	0.308667	176.193	571.598	516.831	385.9	234.5	134.167	274	288.333	218.167	223.667
A641	39.4167	228.44	184.65	96.52	72.0167	11	37.54	27.75	20.3	9.2	2.11667	3.04	2.36667	2.4	1.6	11.3333	20.12	20.2833	12.9	14.4	0.233726	0.312759	0.315519	0.25052	0.308667	172.682	730.574	586.135	385.9	234.5	163.333	242.667	275	218.167	223.667
A654	53.5367	154.22	127.317	96.52	72.0167	11.6333	27.18	16.3667	20.3	9.2	2.03333	2.55	2	2.4	1.6	11.4	15.74	17.5833	12.9	14.4	0.247533	0.27684	0.313184	0.25052	0.308667	215.863	555.011	406.519	385.9	234.5	150.167	241.667	241.833	218.167	223.667
A661	76.4667	114.317	113.783	96.52	72.0167	22.0833	23.4333	15.0833	20.3	9.2	2.44167	2.4	1.93333	2.4	1.6	13.0167	14.0667	15.0833	12.9	14.4	0.222267	0.227195	0.236567	0.25052	0.308667	347.759	498.448	485.463	385.9	234.5	193.5	265.667	265.167	218.167	223.667
A679	108.98	125.15	177.25	96.52	72.0167	19.15	18.95	23.4333	20.3	9.2	2.92	2.41667	2.19167	2.4	1.6	12.325	13.3167	16.8833	12.9	14.4	0.17084	0.255233	0.291833	0.25052	0.308667	645.267	500.252	613.054	385.9	234.5	204	272.667	283.833	218.167	223.667
A680	105.45	115.083	190.7	96.52	72.0167	19.8167	18.2167	24.45	20.3	9.2	2.70833	2.375	2.26667	2.4	1.6	13.1833	13.2	17.6	12.9	14.4	0.2397	0.245233	0.323968	0.25052	0.308667	441.233	471.493	586.171	385.9	234.5	219.333	266.5	292.667	218.167	223.667
A682	85.66	191.15	124.283	96.52	72.0167	14.38	25.5333	14.4333	20.3	9.2	1.88	2.28333	1.775	2.4	1.6	15.6	17.2833	17.4833	12.9	14.4	0.30352	0.305657	0.308967	0.25052	0.308667	284.371	621.926	398.152	385.9	234.5	208.667	299.5	254.667	218.167	223.667
B103	53.82	147.833	159.867	96.52	72.0167	12.74	22.5167	19.9	20.3	9.2	2.35	2.55	2.20833	2.4	1.6	14.42	15.8333	20.4	12.9	14.4	0.25356	0.282633	0.27657	0.25052	0.308667	214.407	525.028	578.304	385.9	234.5	162.833	268.167	286.667	218.167	223.667
B104	89.9	154.35	260.8	96.52	72.0167	26.2667	30.8333	56.325	20.3	9.2	2.5	2.51667	2.7875	2.4	1.6	13.2	15.1	22.425	12.9	14.4	0.274567	0.278499	0.393169	0.25052	0.308667	326.145	559.055	671.409	385.9	234.5	188.167	264.667	262.667	218.167	223.667
B109	113.7	111.2	196.417	96.52	72.0167	16.2	17.9667	21.7167	20.3	9.2	2.175	2.25	2.2	2.4	1.6	14.2	13.3833	17.7333	12.9	14.4	0.2652	0.244357	0.330707	0.25052	0.308667	429.926	445.791	593.947	385.9	234.5	222.667	263	300.167	218.167	223.667
B115	20.1	219.233	212.817	96.52	72.0167	15.0667	22.3667	30.7333	20.3	9.2	1.93333	2.35833	2.21667	2.4	1.6	13.7667	20.9667	20.1667	12.9	14.4	0.307197	0.313519	0.357342	0.25052	0.308667	65.1122	697.632	620.001	385.9	234.5	171.667	295.333	294.833	218.167	223.667
B14A		126.6	216.267	96.52	72.0167		22.75	27.5167	20.3	9.2		2.24167	2.35	2.4	1.6		15.8167	19.3833	12.9	14.4		0.266054	0.347133	0.25052	0.308667		474.153	618.614	385.9	234.5	225.5	277.833	295.333	218.167	223.667
B37	31.22	131.183	186.1	96.52	72.0167	9.36	24.0333	31.0667	20.3	9.2	1.71	2.525	2.45833	2.4	1.6	9.14	14.5333	18.1	12.9	14.4	0.27047	0.252533	0.320659	0.25052	0.308667	116.499	511.356	573.548	385.9	234.5	209.5	264.833	288.833	218.167	223.667
B46	74.76	195.033	126.583	96.52	72.0167	24.14	34.5	20.6667	20.3	9.2	2.33	2.53333	2.15833	2.4	1.6	14.7	17.9667	15.7167	12.9	14.4	0.295697	0.2708	0.310433	0.25052	0.308667	254.898	722.848	472.477	385.9	234.5	204	279	286.833	218.167	223.667
B52	28.84	187.283	162.1	96.52	72.0167	16.68	23.65	21.2833	20.3	9.2	2.71	2.31667	2.16667	2.4	1.6	13.8	16.8333	17.25	12.9	14.4	0.214723	0.287398	0.3146	0.25052	0.308667	128.078	651.868	516.028	385.9	234.5	199.333	284	290.667	218.167	223.667
B57	75.4167	158.6	220.217	96.52	72.0167	25.2333	27.1667	34.7833	20.3	9.2	2.73333	2.68333	2.425	2.4	1.6	12.7	15.4833	19.4333	12.9	14.4	0.297979	0.2483	0.303068	0.25052	0.308667	254.014	639.962	725.594	385.9	234.5	173.5	297.833	306.833	218.167	223.667
B64			195.033	96.52	72.0167			30.85	20.3	9.2			2.25	2.4	1.6			19.4667	12.9	14.4	0.3006		0.360998	0.25052	0.308667	297.405		538.857	385.9	234.5			292	218.167	223.667
B68	36.76	172.1	172.65	96.52	72.0167	18.84	26.0333	21.5833	20.3	9.2	2.08	2.39167	2.15833	2.4	1.6	16.54	17.4167	18.4	12.9	14.4	0.20136	0.2935	0.3108	0.25052	0.308667	168.553	587.993	548.548	385.9	234.5	203.167	282.5	277.667	218.167	223.667
B73	96.52	47.35	154.5	96.52	72.0167	20.34	12.7333	18.1333	20.3	9.2	2.42	2.31667	2.05833	2.4	1.6	12.88	10.1167	15.5	12.9	14.4	0.25052	0.229368	0.2896	0.25052	0.308667	385.898	198.442	529.545	385.9	234.5	218.167	244.833	283.833	218.167	223.667
B73Htrhm	84.6667	36.96	143.467	96.52	72.0167	17.9833	9.74	19.5667	20.3	9.2	2.5	2.09	2.16667	2.4	1.6	12.2833	9.16	15.8667	12.9	14.4	0.2005	0.20396	0.282433	0.25052	0.308667	412.1	184.245	506.243	385.9	234.5	233.833	254.5	294.667	218.167	223.667
B75	66.5833	184.8	182.25	96.52	72.0167	12.6	26.05	24.175	20.3	9.2	1.93333	2.3	2.1625	2.4	1.6	12.7167	16.7167	18.85	12.9	14.4	0.273633	0.2842	0.3084	0.25052	0.308667	243.508	648.734	593.048	385.9	234.5	215.333	301.333	267.833	218.167	223.667
B76	74.52	153.45	190.133	96.52	72.0167	16.46	31.65	27.6	20.3	9.2	2.36	2.6	2.325	2.4	1.6	15.16	16.25	18.1167	12.9	14.4	0.284009	0.316653	0.35568	0.25052	0.308667	264.449	485.611	534.084	385.9	234.5	204	280.5	303.833	218.167	223.667
B77	29.68	181.183	202.533	96.52	72.0167	7.04	25.35	24	20.3	9.2	1.66	2.25	2.175	2.4	1.6	12.6	16.9167	19.5833	12.9	14.4	0.248171	0.289133	0.318392	0.25052	0.308667	129.182	630.993	637.097	385.9	234.5	198.667	302.333	272.167	218.167	223.667
B79	70.46	173.15	195.083	96.52	72.0167	19.44	28.65	20.5833	20.3	9.2	2.96	2.71667	2.43333	2.4	1.6	14.24	15.9833	18.2167	12.9	14.4	0.26776	0.27843	0.304667	0.25052	0.308667	264.852	622.334	641.268	385.9	234.5	218.5	290.5	286	218.167	223.667
B84	92.6667	102.033	189.35	96.52	72.0167	19.5667	22.5167	29.8167	20.3	9.2	2.16667	2.40833	2.33333	2.4	1.6	13.7167	13.9167	18.85	12.9	14.4	0.260133	0.242467	0.324558	0.25052	0.308667	356.05	422.458	574.222	385.9	234.5	206.333	262.333	292.833	218.167	223.667
C103	98.02	156.717	95.225	96.52	72.0167	22.96	23.5667	14.375	20.3	9.2	2.26	2.34167	2.2375	2.4	1.6	18.76	16.35	12.425	12.9	14.4	0.24936	0.297572	0.33835	0.25052	0.308667	393.557	525.279	288.765	385.9	234.5	214.5	270.5	274.5	218.167	223.667
C49	36.2667	137.15	148.72	96.52	72.0167	16.7167	24.0667	20.94	20.3	9.2	2.94167	2.45	2.14	2.4	1.6	10.75	16.2333	18.88	12.9	14.4	0.230179	0.235233	0.25988	0.25052	0.308667	157.041	584.996	559.903	385.9	234.5	158.333	249.833	278.167	218.167	223.667
C49A	30.06	141.667	95.1333	96.52	72.0167	8.22	23.1167	11.0833	20.3	9.2	2.3	2.38333	2.06667	2.4	1.6	9.1	15.6333	16.8	12.9	14.4	0.20775	0.251554	0.221933	0.25052	0.308667	145.94	560.208	430.917	385.9	234.5	148.333	299.667	257.833	218.167	223.667
CH701-30	76.0667	126.9	172.233	96.52	72.0167	12.7333	20.3333	24	20.3	9.2	1.825	2.29167	2	2.4	1.6	13.55	14.3333	19.0833	12.9	14.4	0.267733	0.277814	0.327233	0.25052	0.308667	286.705	464.355	521.727	385.9	234.5	215	280	257	218.167	223.667
CM105	67.65	148.417	152.6	96.52	72.0167	20.7333	22.25	19.9167	20.3	9.2	2.93333	2.425	2.425	2.4	1.6	15.3333	15.9333	17.85	12.9	14.4	0.266867	0.276233	0.280833	0.25052	0.308667	259.19	542.19	549.56	385.9	234.5	169.5	260.667	263	218.167	223.667
CM174	49.6167	98.6667	158.25	96.52	72.0167	11.6333	14.3583	18.3667	20.3	9.2	2.30833	2.14167	2.24167	2.4	1.6	11.3333	13.9667	18.3167	12.9	14.4	0.2035	0.281029	0.27339	0.25052	0.308667	251.209	354.786	585.007	385.9	234.5	174.833	271	266.167	218.167	223.667
CO125	45.5333	123.6		96.52	72.0167	11.9333	18.5667		20.3	9.2	1.91667	2.33333		2.4	1.6	9.38333	12.2167		12.9	14.4	0.18565	0.2442	0.269184	0.25052	0.308667	245.366	498.435	581.623	385.9	234.5	190.167	268.167	271.167	218.167	223.667
DE_2	79.2	167.333	210.467	96.52	72.0167	25.5167	29.85	31.9833	20.3	9.2	2.95	2.71667	2.725	2.4	1.6	12.3333	15.4667	17.7	12.9	14.4	0.313	0.271784	0.349533	0.25052	0.308667	254.672	613.949	598.354	385.9	234.5	215	280.667	292.167	218.167	223.667
DE1	102.55	184.4	212	96.52	72.0167	26.3667	31.0833	29.25	20.3	9.2	2.79167	2.625	2.475	2.4	1.6	15.0167	16.4833	18.4333	12.9	14.4	0.258	0.27986	0.370297	0.25052	0.308667	404.063	662.383	572.799	385.9	234.5	213.667	299.667	294.333	218.167	223.667
DE811	53.8	125.65	151.8	96.52	72.0167	10.9	20.9333	17.4	20.3	9.2	2.075	2.45	2.00833	2.4	1.6	11.5167	15.0333	15.8333	12.9	14.4	0.184867	0.227133	0.273747	0.25052	0.308667	291.368	540.946	554.986	385.9	234.5	226.833	290.5	305.833	218.167	223.667
EP1		156.12	128.317	96.52	72.0167		23.4	15.1667	20.3	9.2		2.61	2.06667	2.4	1.6		15.7	18.4	12.9	14.4		0.28604	0.288106	0.25052	0.308667		549.591	445.494	385.9	234.5	135.8	251.833	260.667	218.167	223.667
F2	63.34	116.883	127.817	96.52	72.0167	8.44	14.3667	13.6833	20.3	9.2	2.32	2.26667	2.21667	2.4	1.6	13.38	14.85	16.9167	12.9	14.4	0.1842	0.270562	0.2736	0.25052	0.308667	346.547	455.591	462.193	385.9	234.5	166.167	271.167	266.667	218.167	223.667
H100	42.5667	159.24	177.217	96.52	72.0167	11.2167	24.76	23.4167	20.3	9.2	2.35	2.6	2.26667	2.4	1.6	10.9	15.92	17.4667	12.9	14.4	0.316951	0.32032	0.363735	0.25052	0.308667	136.961	502.353	493.56	385.9	234.5	192.167	268.5	289.833	218.167	223.667
H105W	49.84	205.817	165.55	96.52	72.0167	13.44	35.3167	21.8167	20.3	9.2	2.78	2.79167	2.49167	2.4	1.6	9.86	18.7833	16.0333	12.9	14.4	0.24072	0.264646	0.304633	0.25052	0.308667	222.162	784.25	545.181	385.9	234.5	196.167	285.167	290.333	218.167	223.667
H49		197.45	247.317	96.52	72.0167		24.0833	30.05	20.3	9.2		2.78333	2.625	2.4	1.6		16	19.8167	12.9	14.4	0.259867	0.296146	0.3269	0.25052	0.308667	266.553	667.787	754.915	385.9	234.5	196.167	297.667	282.167	218.167	223.667
H84	56.1	128.04	163.35	96.52	72.0167	18.2667	22.26	25.4667	20.3	9.2	2.125	2.45	2.21667	2.4	1.6	11.9833	13.76	16.9667	12.9	14.4	0.270633	0.24284	0.300869	0.25052	0.308667	210.056	526.458	540.934	385.9	234.5	199.333	264.5	263.833	218.167	223.667
H91	88.58	134.917		96.52	72.0167	17.84	20.3		20.3	9.2	2.13	2.30833		2.4	1.6	15.84	15.4833		12.9	14.4	0.26228	0.284533		0.25052	0.308667	336.1	475.177		385.9	234.5	213.5	274.167		218.167	223.667
H95	68.35	145.55	215.15	96.52	72.0167	16.2833	22.25	25.75	20.3	9.2	2.65	2.61667	2.40833	2.4	1.6	12.8167	14.8667	19.3167	12.9	14.4	0.201833	0.2191	0.3019	0.25052	0.308667	343.089	662.795	711.627	385.9	234.5	184.833	278	295.5	218.167	223.667
H99	67.18	203.1	131.75	96.52	72.0167	13.48	28.4	19.8	20.3	9.2	2.23333	2.58333	2.56667	2.4	1.6	12.8167	16.8833	17.05	12.9	14.4	0.2529	0.260771	0.341033	0.25052	0.308667	254.463	785.235	452.188	385.9	234.5	158.5	296.167	264.833	218.167	223.667
HP301	44.1		179.1	96.52	72.0167	9.5		19.0333	20.3	9.2	2.18333		2.23333	2.4	1.6	12.8667		16.95	12.9	14.4	0.100767	0.204237	0.303037	0.25052	0.308667	436.956	598.537	596.999	385.9	234.5	217	264.833	298.833	218.167	223.667
Il101	35.3	85.9167	104.233	96.52	72.0167	9.75	12.85	12.9667	20.3	9.2	1.8	1.925	1.76667	2.4	1.6	12.5	14.4	19.0667	12.9	14.4	0.224144	0.214667	0.273567	0.25052	0.308667	173.242	397.762	387.32	385.9	234.5	159.5	263	259.333	218.167	223.667
Il14H	27.42	147.183	140.883	96.52	72.0167	5.74	23.25	16.8333	20.3	9.2	1.94	2.85	2.15833	2.4	1.6	9.14	14.8833	15.85	12.9	14.4	0.272645	0.283433	0.317909	0.25052	0.308667	99.058	516.396	444.455	385.9	234.5	210	301.167	287.833	218.167	223.667
K148	8.4	194.95	92.4667	96.52	72.0167	11.3	38.5	26.2667	20.3	9.2	1.8	2.8875	2.125	2.4	1.6	10.7	16.525	17.2833	12.9	14.4		0.28505	0.307536	0.25052	0.308667		684.788	297.681	385.9	234.5	203	275.167	310.333	218.167	223.667
Ky226	11.9333			96.52	72.0167	11.7			20.3	9.2	2.01667			2.4	1.6	10.8			12.9	14.4	0.198636			0.25052	0.308667	60.948			385.9	234.5	198			218.167	223.667
M14	36.95	164.1	178.383	96.52	72.0167	9.3	25.575	22.2667	20.3	9.2	2.05	2.15	2.35	2.4	1.6	10.4	15.44	20.2167	12.9	14.4	0.2106	0.253476	0.286367	0.25052	0.308667	175.835	643.703	643.241	385.9	234.5	183.333	274.167	285.167	218.167	223.667
MEF156-55-2	18.8	163.667	135.633	96.52	72.0167	5	16.9167	13.0833	20.3	9.2	1.84	2.175	2.13333	2.4	1.6	8.58	15.5333	16.7333	12.9	14.4	0.20916	0.255333	0.248167	0.25052	0.308667	91.9736	642.207	549.243	385.9	234.5	195.167	276.667	282.167	218.167	223.667
Mo17	72.0167	176.233	75.5167	96.52	72.0167	9.18333	19.35	7.83333	20.3	9.2	1.63333	2.14167	1.45	2.4	1.6	14.4167	15.5	14.2167	12.9	14.4	0.308667	0.275677	0.274787	0.25052	0.308667	234.502	642.245	276.778	385.9	234.5	223.667	299.5	245.5	218.167	223.667
Mo44	18.02	136.233	206.45	96.52	72.0167	20.1	26.5167	27.7333	20.3	9.2	1.89	2.48333	2.10833	2.4	1.6	14.52	16	20.45	12.9	14.4	0.217089	0.227433	0.310167	0.25052	0.308667	75.1051	602.936	665.689	385.9	234.5	171.5	283.667	306	218.167	223.667
Mo45	17.5167	138.367	87.2	96.52	72.0167	14.75	29.0667	23.8333	20.3	9.2	2.275	2.25833	2.175	2.4	1.6	13.0667	18.6833	18.7333	12.9	14.4	0.196559	0.242633	0.299683	0.25052	0.308667	90.9429	560.564	289.834	385.9	234.5	233.667	291.667	265.667	218.167	223.667
Mo46	63.7667	151.983	27.25	96.52	72.0167	12.8	30.1167	13.35	20.3	9.2	2.48333	2.65	1.775	2.4	1.6	9.8	15.4333	13.45	12.9	14.4	0.2832	0.346937	0.325076	0.25052	0.308667	225.164	438.874	74.9703	385.9	234.5	203.833	277.5	254.333	218.167	223.667
Mo47	89.34	60	164.817	96.52	72.0167	8.5	17.9	30.9333	20.3	9.2	2.18	2.35	2.575	2.4	1.6	11.08	11.9	16.2167	12.9	14.4	0.1956	0.218733	0.296833	0.25052	0.308667	458.907	274.004	567.473	385.9	234.5	183.833	274.333	298.167	218.167	223.667
MS1334		173.06	140.633	96.52	72.0167		28.14	17.9833	20.3	9.2		2.51	1.96667	2.4	1.6		18.98	18.95	12.9	14.4		0.29092	0.272421	0.25052	0.308667		595.807	516.009	385.9	234.5	159.2	253.5	274.5	218.167	223.667
MS153	109.983	185.167	130.117	96.52	72.0167	20.75	25.2167	15.9833	20.3	9.2	2.51667	2.58333	2.23333	2.4	1.6	15.25	15.2167	16.5333	12.9	14.4	0.326052	0.310388	0.304444	0.25052	0.308667	336.413	596.593	436.714	385.9	234.5	220.667	294.667	295.5	218.167	223.667
MS71	64.85	199.12	176.133	96.52	72.0167	24.6333	27.94	19.8833	20.3	9.2	2.34167	2.56	2.1	2.4	1.6	14.8333	17.5	19.4167	12.9	14.4	0.2657	0.27988	0.293967	0.25052	0.308667	244.87	710.468	607.524	385.9	234.5	188.833	282.333	289	218.167	223.667
N192	74.85		196.85	96.52	72.0167	13.2167		20.6833	20.3	9.2	2.64167		2.23333	2.4	1.6	12.6667		19.9167	12.9	14.4	0.275867		0.307667	0.25052	0.308667	272.741		638.812	385.9	234.5	185	248.667	277.5	218.167	223.667
N28Ht	55.1	158.86	226.15	96.52	72.0167	17.28	24.6	31.0833	20.3	9.2	2.37	2.36667	2.6	2.4	1.6	11.72	17.4833	19.65	12.9	14.4	0.23788	0.284444	0.3202	0.25052	0.308667	233.845	631.79	707.408	385.9	234.5	187.5	265.667	273.167	218.167	223.667
N6	31.3667	120.767	187.567	96.52	72.0167	17.8167	23.75	27.7667	20.3	9.2	2.5	2.18333	2.35	2.4	1.6	13.0833	16.5333	19.9167	12.9	14.4	0.297181	0.244511	0.332567	0.25052	0.308667	105.19	509.567	571.717	385.9	234.5	186.5	277.667	283.833	218.167	223.667
NC262	66.02	208.04	176.2	96.52	72.0167	11.06	28.9	20.0167	20.3	9.2	3.06	2.76	2.425	2.4	1.6	11.42	17.56	15.9333	12.9	14.4	0.20588	0.26636	0.330906	0.25052	0.308667	320.998	776.22	533.804	385.9	234.5	159.333	275.333	273.5	218.167	223.667
NC264	60.6333	155.3	155.55	96.52	72.0167	11.8167	21.4667	20.95	20.3	9.2	2.30833	2.40833	2.26667	2.4	1.6	11	16.3333	16.95	12.9	14.4	0.261533	0.280791	0.334067	0.25052	0.308667	233.69	552.423	468.472	385.9	234.5	202	310.5	262.5	218.167	223.667
NC268	63.5	84.45	196.883	96.52	72.0167	9.05	16.5	26.2833	20.3	9.2	2.08	1.99167	2.125	2.4	1.6	11.82	13.7333	18.2	12.9	14.4	0.21988	0.229833	0.312471	0.25052	0.308667	278.225	366.943	632.613	385.9	234.5	196	239.5	287.667	218.167	223.667
NC292	44.9667	122.25	189.96	96.52	72.0167	14.1333	23.1667	26.88	20.3	9.2	2.88333	2.525	2.43	2.4	1.6	10.85	13.3667	17	12.9	14.4	0.235237	0.256867	0.29444	0.25052	0.308667	204.179	476.021	646.797	385.9	234.5	195	235.833	280.667	218.167	223.667
NC294	61	125.02	192.483	96.52	72.0167	13.4167	21.64	22.3833	20.3	9.2	2.39167	2.4	2.16667	2.4	1.6	11.1833	14.58	18.0333	12.9	14.4	0.233433	0.237207	0.273633	0.25052	0.308667	258.883	533.484	704.327	385.9	234.5	239.167	261.333	303.833	218.167	223.667
NC306	42.75	86.46	199.8	96.52	72.0167	8.5	18.04	24.8667	20.3	9.2	1.775	2.27	2.25833	2.4	1.6	9.25	13.54	17.9833	12.9	14.4	0.237336	0.24556	0.327674	0.25052	0.308667	175.43	344.671	610.347	385.9	234.5	178.333	247.167	295.833	218.167	223.667
NC308	5.9	118.05	249.283	96.52	72.0167	10.8	21.7667	32.8667	20.3	9.2	2.1	2.275	2.38333	2.4	1.6	10.3	14.4333	20.1167	12.9	14.4		0.249633	0.365976	0.25052	0.308667		475.823	682.409	385.9	234.5	205.833	267.167	278	218.167	223.667
NC310	77.4667	111.767	196.233	96.52	72.0167	19.05	21.55	24.9833	20.3	9.2	2.45	2.75	2.06667	2.4	1.6	11.9167	14.6167	16.9833	12.9	14.4	0.158533	0.226467	0.278567	0.25052	0.308667	489.591	489.365	704.299	385.9	234.5	202.333	234.667	303.333	218.167	223.667
NC312	48.6	79.08	140.967	96.52	72.0167	12.02	21.42	20.2333	20.3	9.2	2.3	2.35	1.975	2.4	1.6	12.12	14.7	16.05	12.9	14.4	0.24784	0.30436	0.2959	0.25052	0.308667	193.513	262.8	478.358	385.9	234.5	189.167	249.667	272	218.167	223.667
NC314	28.4667	119.05	76.8667	96.52	72.0167	7.91667	20.6167	17.2667	20.3	9.2	1.96667	2.31667	2.04167	2.4	1.6	10.7333	14.5333	14.7667	12.9	14.4	0.230511	0.263143	0.302668	0.25052	0.308667	122.605	451.287	245.568	385.9	234.5	206.667	267.167	277.5	218.167	223.667
NC316	100.733	144.633	245.7	96.52	72.0167	18.9667	23.3333	32.0167	20.3	9.2	2.31667	2.40833	2.34167	2.4	1.6	13.9333	15.3	21.4833	12.9	14.4	0.259678	0.2345	0.358	0.25052	0.308667	397.193	617.456	687.905	385.9	234.5	236.167	261.833	296.5	218.167	223.667
NC324	22.4667	147.94		96.52	72.0167	12.825	23.8		20.3	9.2	2.5	2.84		2.4	1.6	13.2	15.32		12.9	14.4		0.24016		0.25052	0.308667		617.246		385.9	234.5	191.833	271.667	303	218.167	223.667
NC326	67.6167	20.95	188.533	96.52	72.0167	19.4833	9.3	23.5667	20.3	9.2	2.91667	2.0125	2.21667	2.4	1.6	13.05	9.4	17.7333	12.9	14.4	0.181367	0.166702	0.296615	0.25052	0.308667	371.946	99.5541	642.319	385.9	234.5	211.5	229.5	300.167	218.167	223.667
NC328	60.88	78.0667	152.017	96.52	72.0167	16.02	15.2167	17.4	20.3	9.2	2.34	2.325	2.05	2.4	1.6	12.48	11.55	16.1833	12.9	14.4	0.21	0.2246	0.299947	0.25052	0.308667	293.304	346.264	503.357	385.9	234.5	205.333	242.5	293.667	218.167	223.667
NC330	70.15	8.11667	176.76	96.52	72.0167	25.3667	6.53333	30.4333	20.3	9.2	2.525	2.01667	2.48333	2.4	1.6	13.2	7.63333	17.35	12.9	14.4	0.204867	0.165148	0.29455	0.25052	0.308667	342.54	47.7061	688.56	385.9	234.5	213.5	225.167	262.5	218.167	223.667
NC332	26.9	176.483	136.283	96.52	72.0167	7.62	23.85	18.7	20.3	9.2	1.6	2.4	2	2.4	1.6	9.52	17.5333	18.0333	12.9	14.4	0.20948	0.256675	0.290633	0.25052	0.308667	127.56	705.836	473.272	385.9	234.5	205.25	285.333	297.333	218.167	223.667
NC342		205.18	226.133	96.52	72.0167		32.35	32.2167	20.3	9.2		2.54167	2.39167	2.4	1.6		18.1333	20.55	12.9	14.4	0.248602	0.252367	0.308892	0.25052	0.308667	141.578	679.421	732.507	385.9	234.5	199.667	274.5	280	218.167	223.667
NC364	51.8667	158.783	158.75	96.52	72.0167	18.2667	23.5	22.6833	20.3	9.2	2.275	2.26667	2.23333	2.4	1.6	13.7333	15.8333	16.9667	12.9	14.4	0.2573	0.272053	0.301324	0.25052	0.308667	207.57	585.007	523.333	385.9	234.5	196.167	323.167	288.167	218.167	223.667
NC372	64.7	70.8	228.483	96.52	72.0167	14.9667	14.3	26.5167	20.3	9.2	2.75833	2.65	2.41667	2.4	1.6	11.3	11.02	18.6167	12.9	14.4	0.173067	0.21404	0.294867	0.25052	0.308667	362.02	326.324	780.009	385.9	234.5	202	250.167	304.167	218.167	223.667
ND246	34.62	132.183	140.483	96.52	72.0167	10.74	19.9833	20.9833	20.3	9.2	1.7	2.075	1.875	2.4	1.6	13.68	15.1	18.6	12.9	14.4	0.12196	0.253567	0.260477	0.25052	0.308667	277.151	523.541	540.437	385.9	234.5	163.167	268	258	218.167	223.667
Oh43	106.417	177	183.75	96.52	72.0167	14.65	22.6	20.2333	20.3	9.2	2.50833	2.41667	2.11667	2.4	1.6	15.3	14.9	18.3833	12.9	14.4	0.2275	0.283167	0.333475	0.25052	0.308667	471.426	629.667	553.074	385.9	234.5	201.5	297.667	279.167	218.167	223.667
Oh43E	90.8	171.14	187.25	96.52	72.0167	12.95	21.98	21.25	20.3	9.2	2.60833	2.46	2.23333	2.4	1.6	12.6333	15.3	18.5333	12.9	14.4	0.2781	0.2962	0.3388	0.25052	0.308667	329.453	579.434	552.172	385.9	234.5	176.167	266.833	279	218.167	223.667
Os420	68.3	187.567	190.533	96.52	72.0167	19.85	26.9333	26.25	20.3	9.2	2.85833	2.56667	2.425	2.4	1.6	14.1	16.2167	20.4667	12.9	14.4	0.231445	0.282067	0.32323	0.25052	0.308667	302.289	664.728	589.712	385.9	234.5	185.167	294.167	288.333	218.167	223.667
P39		145.117	177.317	96.52	72.0167		17.2	19.6833	20.3	9.2		2.24167	2.175	2.4	1.6		16.5167	19.8	12.9	14.4		0.24462	0.318271	0.25052	0.308667		592.035	560.605	385.9	234.5	170	279.167	265	218.167	223.667
Pa762	69.725	199.583	177.767	96.52	72.0167	13.025	28.7833	23.3667	20.3	9.2	2.2875	2.5	2.2	2.4	1.6	13.175	17.0667	18.7833	12.9	14.4	0.2306	0.293133	0.354033	0.25052	0.308667	308.961	684.848	501.2	385.9	234.5	197.333	288.667	282.5	218.167	223.667
Pa875		115.85	208.783	96.52	72.0167		20.7833	23.7	20.3	9.2		2.50833	2.46667	2.4	1.6		13.8833	17.0667	12.9	14.4		0.269301	0.317	0.25052	0.308667		433.964	663.153	385.9	234.5	#DIV/0!	265.5	292.167	218.167	223.667
Pa880	55.4333	143.7	135.083	96.52	72.0167	24.0333	29.1333	32.2833	20.3	9.2	2.96667	2.66667	2.59167	2.4	1.6	13.0833	14.35	16.85	12.9	14.4	0.2123	0.213367	0.315099	0.25052	0.308667	259.754	671.058	428.388	385.9	234.5	220.333	286.333	297.333	218.167	223.667
Pa91	86.3	191.783	206.533	96.52	72.0167	18.25	28.2333	25.4167	20.3	9.2	2.71667	2.35	2.36667	2.4	1.6	14.7833	17.8	21.1	12.9	14.4	0.267833	0.274581	0.364167	0.25052	0.308667	322.588	687.735	567.881	385.9	234.5	213.167	284.5	291.167	218.167	223.667
R168	50.5667	205.483	163.033	96.52	72.0167	10.5633	29.1167	20.35	20.3	9.2	2.05833	2.41667	2.13333	2.4	1.6	13.95	18.7	17.25	12.9	14.4	0.133733	0.260667	0.271933	0.25052	0.308667	381.822	788.513	599.635	385.9	234.5	211.5	287.833	275.833	218.167	223.667
R177	6.08	144.767	192.983	96.52	72.0167	7	22.6333	23.4	20.3	9.2	1.63	2.23333	2.25833	2.4	1.6	10.36	14.6	20.3	12.9	14.4	0.237477	0.262469	0.338633	0.25052	0.308667	23.5233	539.991	570.169	385.9	234.5	204.333	285.667	282.5	218.167	223.667
R4	50.4833	100.383	169.25	96.52	72.0167	15.7167	22.3	24.45	20.3	9.2	2.225	2.325	2.29167	2.4	1.6	12.25	15.2833	18.8167	12.9	14.4	0.2547	0.217967	0.2534	0.25052	0.308667	198.552	464.752	668.096	385.9	234.5	207.667	260.5	272	218.167	223.667
SD40	90.2333	138.917	231.133	96.52	72.0167	13.7667	19.5833	33.7667	20.3	9.2	2.425	2.425	2.55833	2.4	1.6	12.5	14.0833	21.85	12.9	14.4	0.270267	0.2947	0.333567	0.25052	0.308667	334.046	473.079	694.766	385.9	234.5	200	288.5	264.667	218.167	223.667
SD44	78.7333	153.733	177.217	96.52	72.0167	17.1167	23.2333	24.35	20.3	9.2	2.25833	2.48333	2.6	2.4	1.6	13.3833	15.0833	19	12.9	14.4	0.205567	0.271833	0.27101	0.25052	0.308667	377.609	562.44	654.132	385.9	234.5	200.667	295	316	218.167	223.667
Sg18	37.36	99.1333	159.65	96.52	72.0167	9.58	20.1167	26.6	20.3	9.2	1.77	2.10833	2.08333	2.4	1.6	11.74	15.55	20.1167	12.9	14.4	0.10948	0.1769	0.248367	0.25052	0.308667	340.052	557.375	642.742	385.9	234.5	239.167	299.333	272	218.167	223.667
Va102		179.3	152.583	96.52	72.0167		26.6	21.9167	20.3	9.2		2.43333	1.98333	2.4	1.6		17.4667	18.5167	12.9	14.4		0.334208	0.30036	0.25052	0.308667		542.369	520.735	385.9	234.5	200.667	294.833	299.5	218.167	223.667
Va14	24.5	181.24	128.133	96.52	72.0167	8.44	32.62	20.6167	20.3	9.2	1.65	2.55	2.13333	2.4	1.6	9.84	18.08	17.1833	12.9	14.4	0.147943	0.22796	0.299585	0.25052	0.308667	151.595	778.283	423.306	385.9	234.5	191	284.5	298.167	218.167	223.667
Va17	35.8667	156.32	170.25	96.52	72.0167	12.5	29.92	28.8833	20.3	9.2	1.95	2.8	2.55	2.4	1.6	14.4	17.34	17.8667	12.9	14.4	0.26381	0.24588	0.345903	0.25052	0.308667	143.911	627.378	492.418	385.9	234.5	187	299.667	304	218.167	223.667
Va22	36.24	164.64	181.6	96.52	72.0167	20.22	35.26	33.7167	20.3	9.2	1.96	2.49	2.24167	2.4	1.6	15.5	19.1	21.6	12.9	14.4	0.17196	0.27832	0.318594	0.25052	0.308667	217.363	591.723	568.368	385.9	234.5	191.833	285.333	276.5	218.167	223.667
Va35	95.24	91.94	136.067	96.52	72.0167	16.92	18.46	20.2	20.3	9.2	2.52	2.09	2.125	2.4	1.6	18	13.5	17.5	12.9	14.4	0.2514	0.273041	0.34337	0.25052	0.308667	379.655	327.108	392.433	385.9	234.5	189.833	266.667	292.5	218.167	223.667
Va85	25.35	206.6	194.267	96.52	72.0167	15.3	31.5833	29.5	20.3	9.2	1.80833	2.69167	2.23333	2.4	1.6	16.1667	17.8833	20.3667	12.9	14.4	0.35166	0.277964	0.348867	0.25052	0.308667	73.2573	742.272	557.34	385.9	234.5	201.667	318.5	280.667	218.167	223.667
Va99	101.367	216.883	220.517	96.52	72.0167	18.0333	31.25	30.3667	20.3	9.2	2.16667	2.51667	2.325	2.4	1.6	14.15	18.4	21.3833	12.9	14.4	0.276967	0.296654	0.36346	0.25052	0.308667	364.813	729.26	606.524	385.9	234.5	194.667	255.5	272.167	218.167	223.667
W182B	67.6333	190.867	121.467	96.52	72.0167	16.05	30.1667	17.8	20.3	9.2	1.89167	2.35	1.99167	2.4	1.6	16.2833	17.7333	19.4333	12.9	14.4	0.200867	0.254833	0.228767	0.25052	0.308667	337.777	758.023	531.582	385.9	234.5	182.833	299.833	294	218.167	223.667
W22	61.8667	146.433	198.3	96.52	72.0167	11.7833	23.8667	25.3	20.3	9.2	2.35833	2.35833	2.25833	2.4	1.6	13.5167	15.1833	18.5	12.9	14.4	0.1871	0.219565	0.300407	0.25052	0.308667	334.523	665.261	670.785	385.9	234.5	197.667	285	290	218.167	223.667
W401		130.667	128.5	96.52	72.0167		17.1	16	20.3	9.2		2.08333	1.95	2.4	1.6		14.1	15.5667	12.9	14.4	0.22432	0.258767	0.2524	0.25052	0.308667	274.632	507.437	509.835	385.9	234.5	178.833	254.333	265.833	218.167	223.667
W64A	31.75	213.4	243.04	96.52	72.0167	8.775	36.2667	34.38	20.3	9.2	2.075	2.66667	2.4	2.4	1.6	12.125	18.9667	23.44	12.9	14.4	0.21295	0.270767	0.329504	0.25052	0.308667	153.208	786.627	742.836	385.9	234.5	185.5	277.5	286.5	218.167	223.667
Wf9	106.02	188.45	230.083	96.52	72.0167	19.88	27.8667	33.6333	20.3	9.2	2.32	2.51667	2.53333	2.4	1.6	13.44	15.1167	19.95	12.9	14.4	0.2462	0.284799	0.356986	0.25052	0.308667	429.279	659.508	643.677	385.9	234.5	220.5	290.167	267.833	218.167	223.667
Yu796_NS	80.8833	159.867	155.7	96.52	72.0167	10.6833	24	16.3	20.3	9.2	2.24167	2.275	1.99167	2.4	1.6	11.55	15.4833	17.1333	12.9	14.4	0.237733	0.308333	0.326461	0.25052	0.308667	341.04	520.665	479.749	385.9	234.5	222.5	286.667	293.5	218.167	223.667
